# Supplementary material for: Progressive Mobilization Program for Patients With Acute Heart Failure Reduces Hospital Stay and Improves Clinical Outcome
Source: PubMed Central journal article supplement — Circ Rep. 2019 Feb 19;1(3):123–30. doi: 10.1253/circrep.CR-19-0004 (PMC7890289; doi:10.1253/circrep.cr-19-0004), 2019-02-19

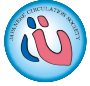

---

## **Progressive Mobilization Program for Patients With Acute Heart Failure Reduces Hospital Stay and Improves Clinical Outcome**

---

Naoya Kakutani, BSc; Arata Fukushima, MD, PhD; Shintaro Kinugawa, MD, PhD;  
Takashi Yokota, MD, PhD; Tatsuya Oikawa, MD; Mikito Nishikawa, MD, PhD;  
Risako Nakamura; Takanori Tsukada; Shigeki Mori;  
Ichiro Yoshida, MD; Toshihisa Anzai, MD, PhD

# Supplementary Figure

## Exercise program: Stage I

- Purpose:
  - To prevent contractures
- Programs:
  - Elevating the head of the bed
  - Passive ROM exercise (upper and lower extremity and trunk)

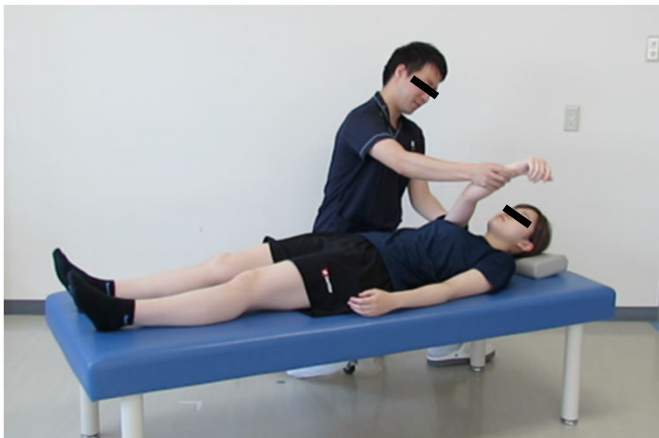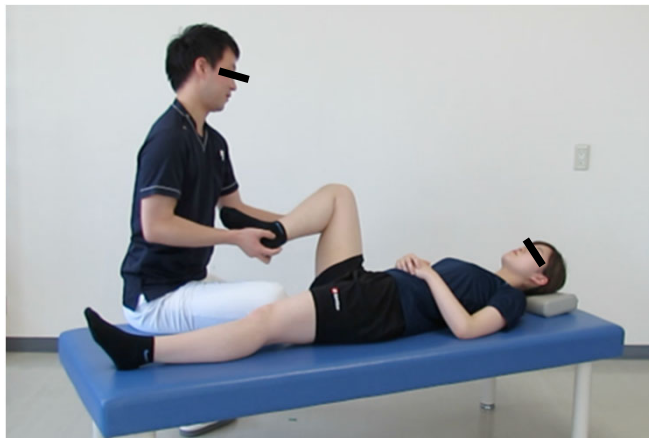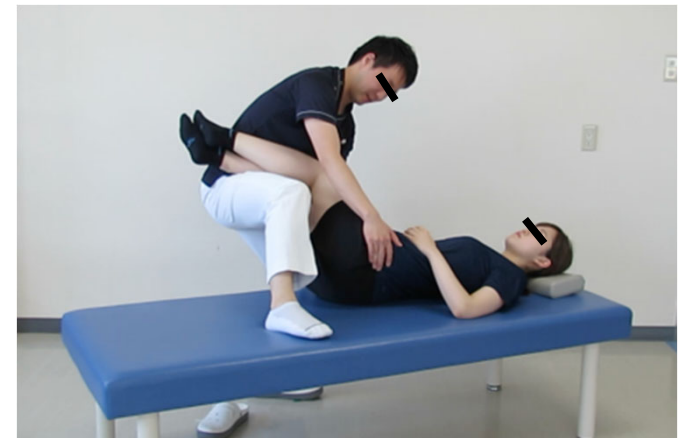

# Exercise program: Stage II

- Purpose:
  - To improve muscle power output
  - To maintain trunk muscles strength and sitting balance
- Repetitions:
  - 3–5 repetitions
- Programs:
  - Manual resistance training of lower extremity (Eccentric contraction)
  - Active ROM exercise (Trunk flexion/extension, rotation, and lateral bending)

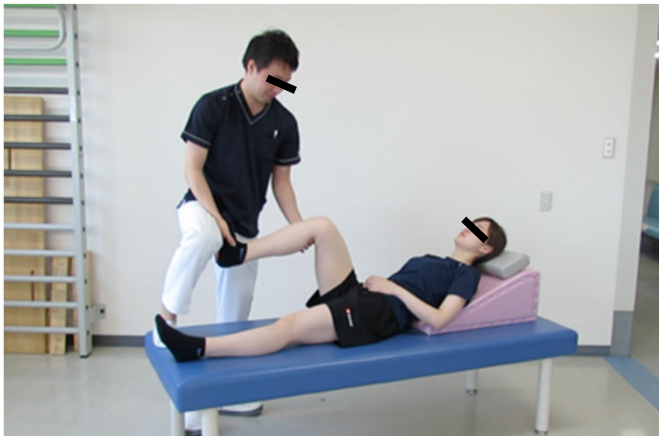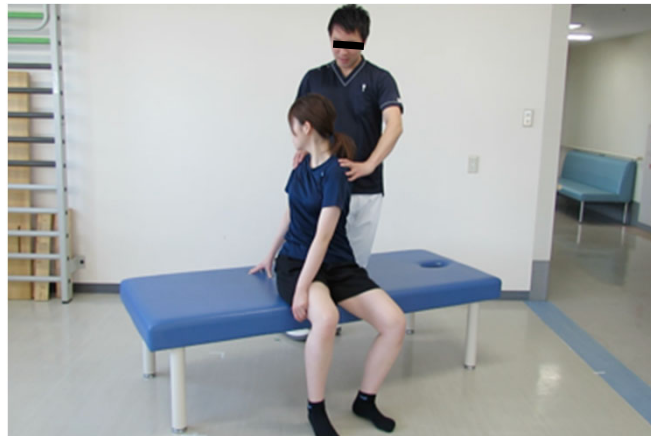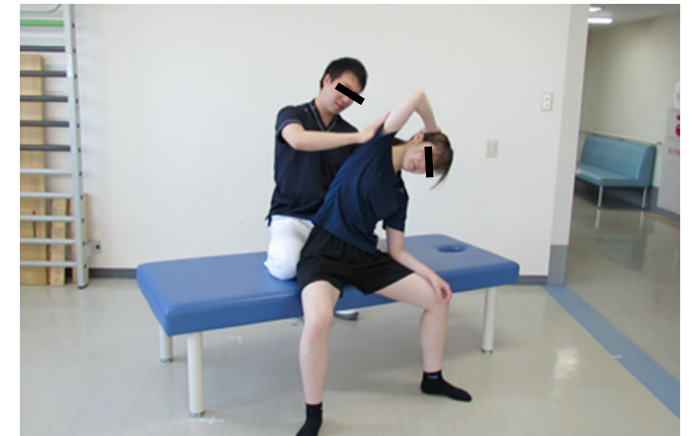

# Exercise program: Stage III

- Purpose:
  - To increase muscle strength, flexibility, and balance for the passive transfer
- Intensity:
  - <30% of 1-RM, RPE <12
- Repetitions:
  - 5–10 repetitions
- Programs:
  - Calisthenic exercise (e.g., trunk exercise and reaching in the sitting position)
  - Keep standing position
  - Weight shift and stand up

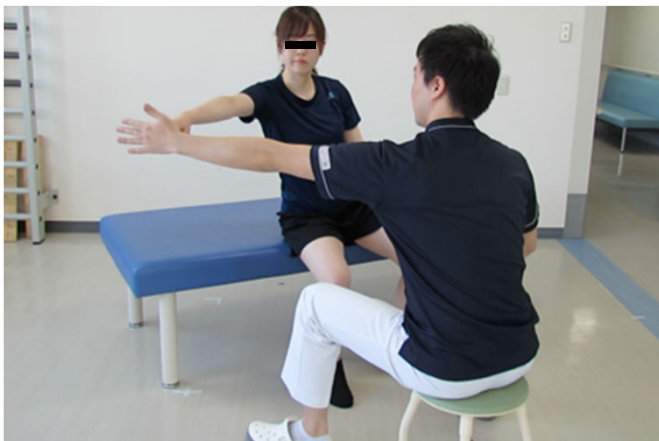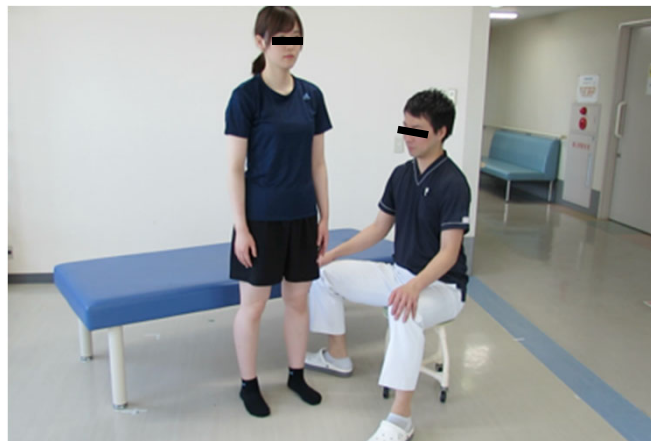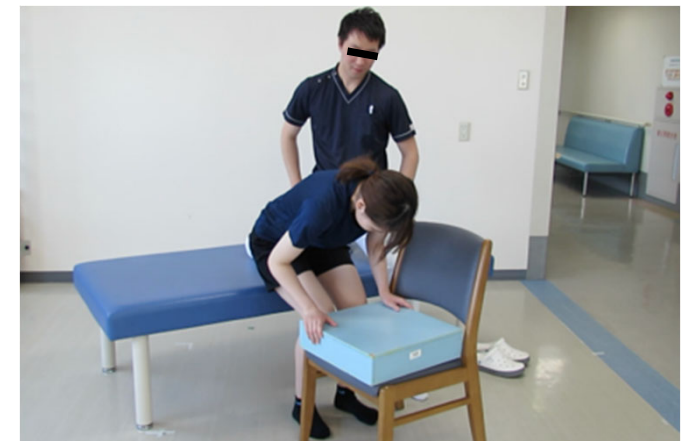

# Exercise program: Stage IV

- Purpose:
  - To improve standing balance and endurance
- Intensity:
  - 30–40% of 1-RM, RPE 12–13
- Repetitions:
  - 10–20 repetitions
- Programs:
  - Calisthenic exercise (e.g., squat, weight shift in the standing position, and stepping in the standing position [slow])
  - Endurance training (e.g., stepping in the sitting position [ $>30$  sec])

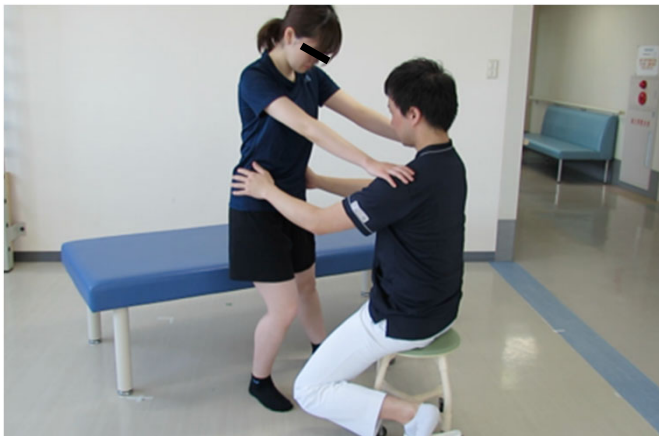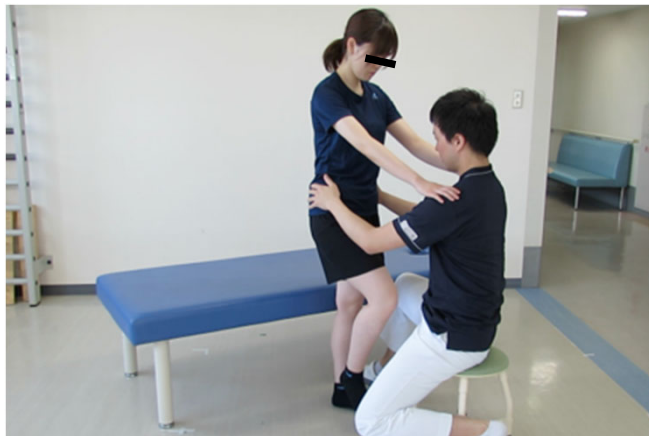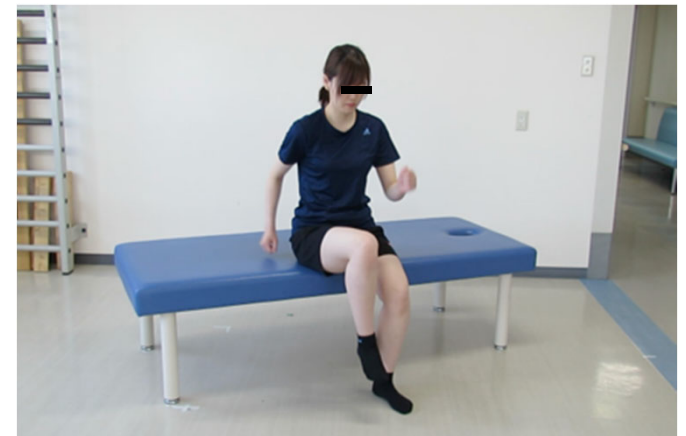

# Exercise program: Stage V

- Purpose:
  - To improve gait ability and to achieve walking endurance to the bathroom
- Intensity:
  - 30–40% of 1-RM, RPE 12–13
- Repetitions:
  - 10–20 repetitions
- Programs:
  - Calisthenic exercise (e.g., squat, bridge + stepping, and reaching in the standing position)
  - Endurance training (e.g., stepping in the standing position [ $>30$  sec])

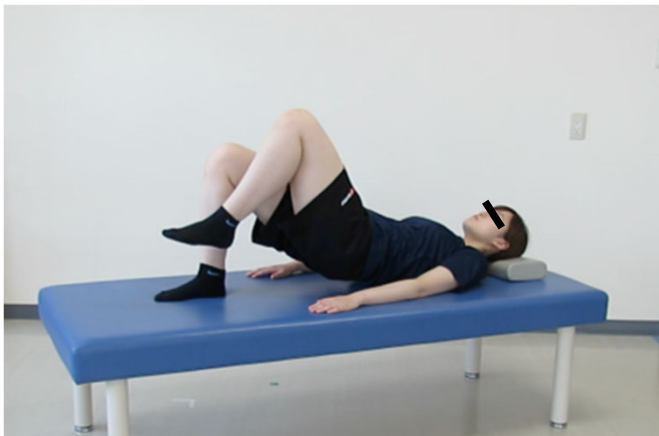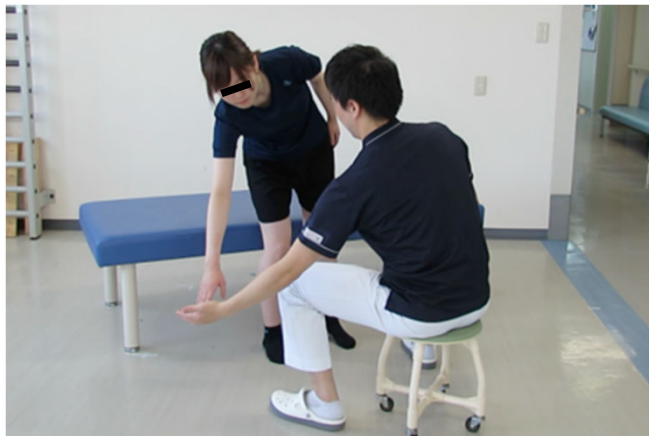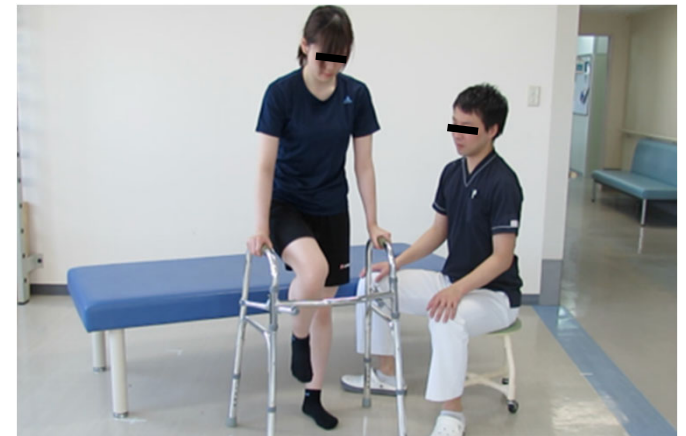



# Exercise program: Stage VI, VII

- Purpose:
  - To increase muscle strength and exercise tolerance
  - To improve the physical function that is required for ADL post-discharge
- Programs:
  - Endurance training (e.g., ergometer, by walking)  
>5 min, RPE <12
  - Resistance training using dumbbells and weight machines  
40%–60% of 1-RM, RPE <15, 8–15 repetitions
  - Advanced training (e.g., one leg standing, one leg squat, side lunge, and one arm chest press)  
30%–40% of 1-RM, RPE 12–13

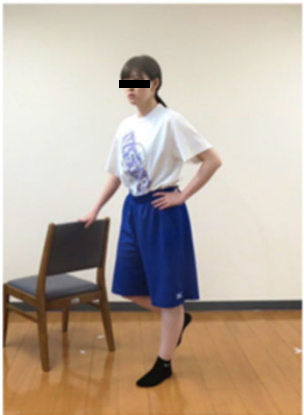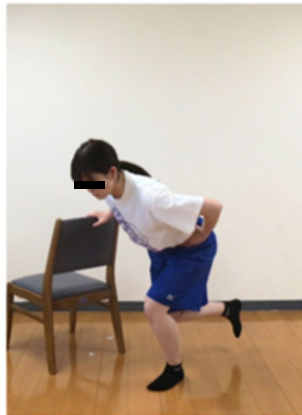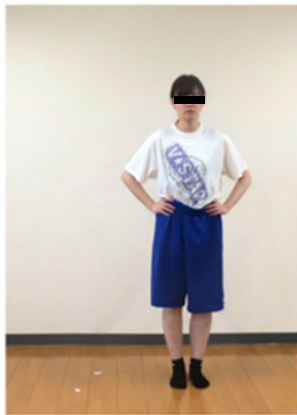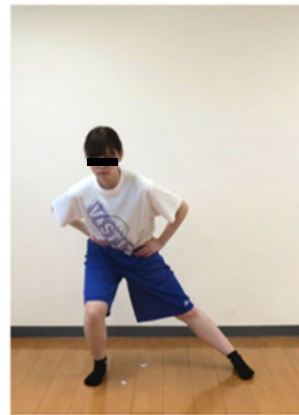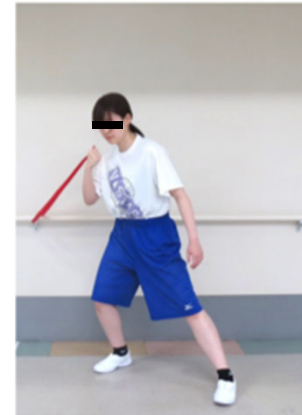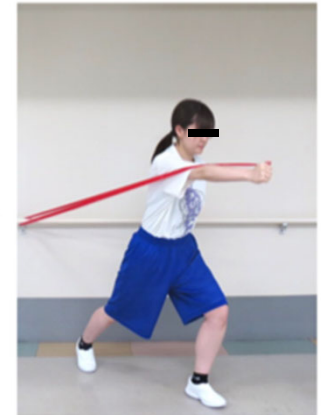

Supplement: circrep-1-123-s001.pdf [file circrep-1-123-s001.pdf]
